# Supplementary material for: Polyvinylamine modified polyester fibers – innovative textiles for the removal of chromate from contaminated groundwater
Source: Royal Society of Chemistry journal article supplement (doi:10.1039/c4ta04212c), 2014-11-05
Supplement: c4ta04212c1.pdf [file c4ta04212c1.pdf]

## Supporting Information for:

Polyvinylamine modified polyester fibers - innovative textiles for the removal of chromate from contaminated ground waters

Thomas Mayer-Gall<sup>†‡,\*</sup>, Klaus Opwis<sup>†</sup>, Jochen S. Gutmann<sup>†‡</sup>

<sup>†</sup> Deutsches Textilforschungszentrum Nord-West gGmbH, Adlerstr. 1, D-47798 Krefeld, Germany

<sup>‡</sup> University Duisburg-Essen, Institute of Physical Chemistry and CENIDE, Universitätsstr. 5, D-45117 Essen, Germany

\*Corresponding author: [mayer-gall@dtnw.de](mailto:mayer-gall@dtnw.de), +49 203 – 379 8218

## Analytics

ICP and chromate analytics was performed by the DTNW Öffentliche Prüfstelle GmbH, a DAkkS and Oeko-Tex Standard 100/200 certified lab. Chromate measurement were performed in accordance with DIN EN ISO 11885. The limit of detection is  $40 \mu\text{g L}^{-1}$ , with a reproducibility of  $\pm 3 \%$ .

Kjeldahl analytics: The limit of detection is  $10 \mu\text{mol g}^{-1}$  with a reproducibility of  $\pm 5 \%$  for standard samples. In case of an textile the reproducibility is  $\pm 15 \%$ .

## SEM Images

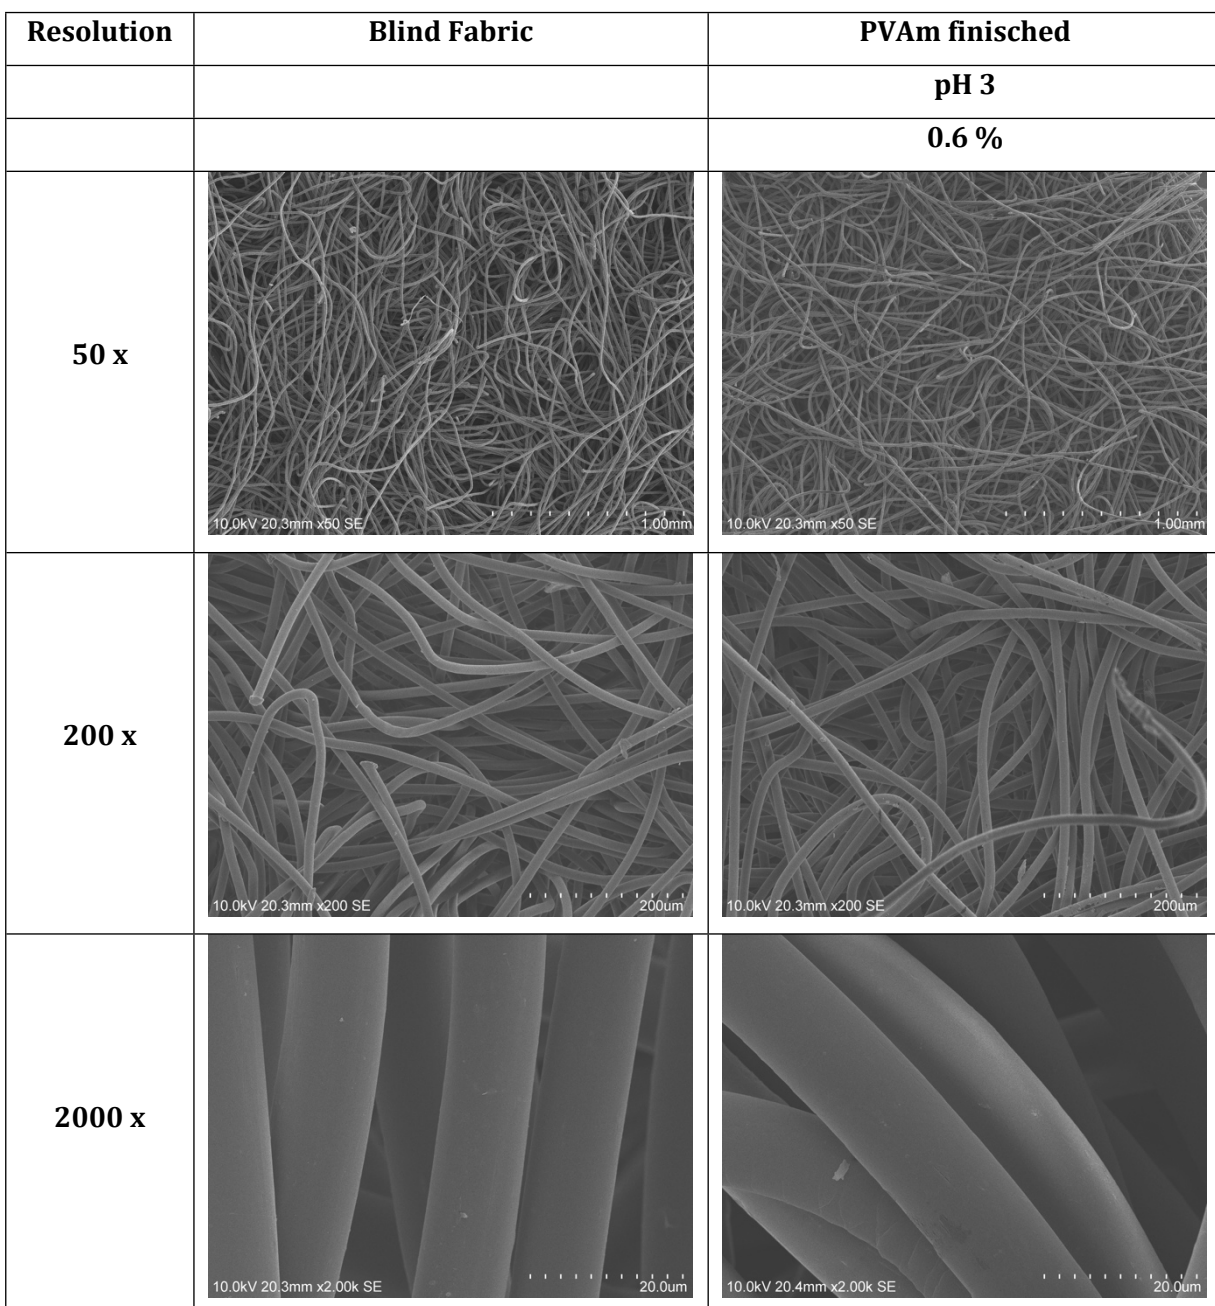

Figure S1.a SEM images of different PVAm modified PET fabrics.

| <b>Resolution</b> | <b>PVAm finished</b>                                                                | <b>PVAm finished</b>                                                                 |
|-------------------|-------------------------------------------------------------------------------------|--------------------------------------------------------------------------------------|
|                   | <b>pH 7</b>                                                                         | <b>pH 11</b>                                                                         |
|                   | <b>6.2 %</b>                                                                        | <b>4.0 %</b>                                                                         |
| <b>50 x</b>       | 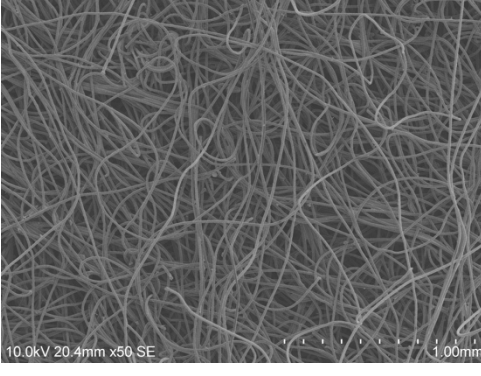   |    |
| <b>200 x</b>      |   |   |
| <b>2000 x</b>     |  |  |

**Figure S1.b SEM images of different PVAm modified PET fabrics.**

**$R_L$  values in a pH-range from 3, 5 to 7.**

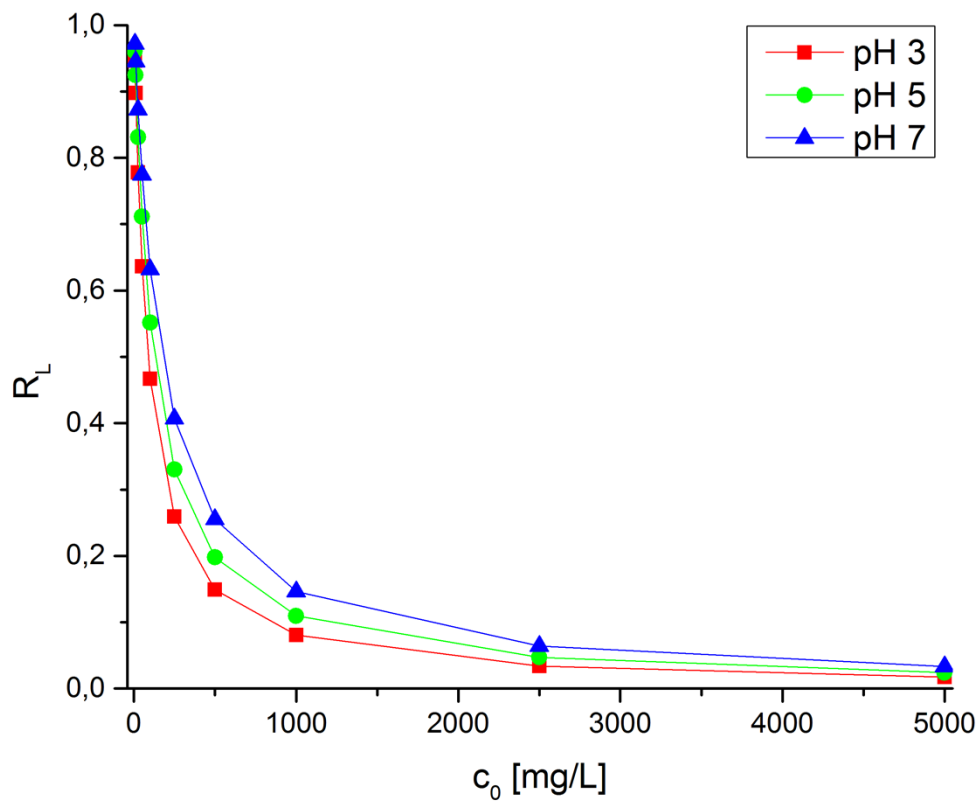

**Figure S2. Separation factor  $R_L$  calculated from the Langmuir constant at different pH values.**

## Analysis of real-life ground-water samples

Table S1. Real-life ground water samples, results of pH, TOC, TN<sub>b</sub> and ICP analysis

| Blind           |                       | Breakthrough measurement run# |                       |                       |                       |
|-----------------|-----------------------|-------------------------------|-----------------------|-----------------------|-----------------------|
|                 |                       | 1                             | 1                     | 2                     | 2                     |
| Parameter       | [mg L <sup>-1</sup> ] | 10 min                        | 55 min                | 10 min                | 45 min                |
|                 |                       | [mg L <sup>-1</sup> ]         | [mg L <sup>-1</sup> ] | [mg L <sup>-1</sup> ] | [mg L <sup>-1</sup> ] |
| Cr              | 56.613                | 0.033                         | 1.130                 | 0.026                 | 10.701                |
| Ca              | 61.20                 | 60.921                        | 61.820                | 60.710                | 60.903                |
| Mg              | 161.90                | 2.535                         | 6.184                 | 1.083                 | 6.217                 |
| Mn              | 0.35                  | 0.143                         | 0.355                 | 0.008                 | 0.237                 |
| Cu              | 0.19                  | 0.121                         | 0.154                 | 0.130                 | 0.170                 |
| Fe              | 1.12                  | 0.912                         | 0.984                 | 1.031                 | 1.080                 |
| TOC             | 95.4 ± 5.9            | 98.7                          | 92.5                  | 92.3                  | 97.1                  |
| TN <sub>b</sub> | 4.33 ± 0.5            | 4.53                          | 4.03                  | 3.98                  | 4.71                  |
| pH              | 7.7                   | -                             | -                     | -                     | -                     |

Table S2. Chromate concentration after 10 min and after breakthrough

| Run | 10 min                | Breakthrough          |
|-----|-----------------------|-----------------------|
|     | [mg L <sup>-1</sup> ] | [mg L <sup>-1</sup> ] |
| 1   | 0,033                 | 1,133                 |
| 2   | 0,026                 | 10,702                |
| 3   | 0,020                 | 9,182                 |
| 4   | 0,047                 | 11,400                |
| 5   | 1,28*                 | 13,403                |
| 6   | 0,050                 | 3,601                 |
| 7   | 0,044                 | 4,310                 |
| 8   | 0,025                 | 1,871                 |

\*Sample take at 17 min.

## Breakthrough Measurement

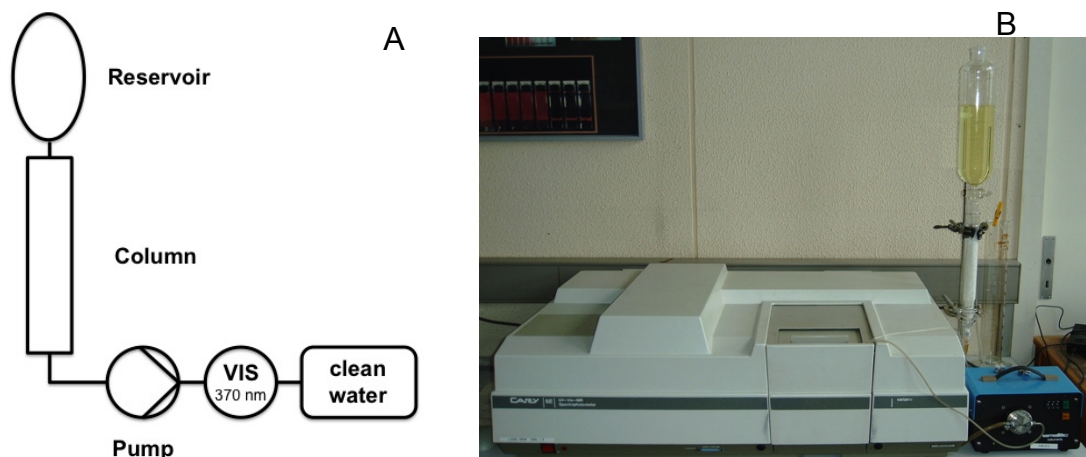

Figure S3. A. Scheme of the measurement set-up for the breakthrough curves and B. measurement equipment

## PVAm leaching

Two different methods were used one to prevent leaching and the other to measure leaching during application. Leaching was prevented by the extraction, the samples were extracted until a constant weight was reached. Typically this was achieved after 8 h, as safety margin the triple extraction time (24 h) was chosen (2.1). Furthermore three samples finished with PVAm at pH 11 of  $10 \times 10 \text{ cm} \approx 1 \text{ g}$  were extracted in a Soxhlet-extractor with water for five days to investigate, if a long time exposure to hot water, reduces the amount of bound PVAm. No change of the weight was observed within an uncertainty of  $\pm 2.5 \%$  and no change of the nitrogen content was observed, within the standard deviation reported in Table 1. Leaching during application was measured in the breakthrough experiments, after 10 minutes and after the breakthrough was reached. The change of the Total Organic Carbon (TOC) and Total Nitrogen ( $\text{TN}_b$ ) was measured with a Hach-Lange TOC cuvette test LCK 386 ( $30\text{-}300 \text{ mg L}^{-1}$ ,  $< 10 \%$ ) and  $\text{TN}_b$  by Hach-Lange LATON cuvette test LCK 138 ( $1\text{-}16 \text{ mg L}^{-1}$ ,  $\pm 5 \%$ ). No change of TOC/ $\text{TN}_b$  was observed. All measurements were done as a triple determination.

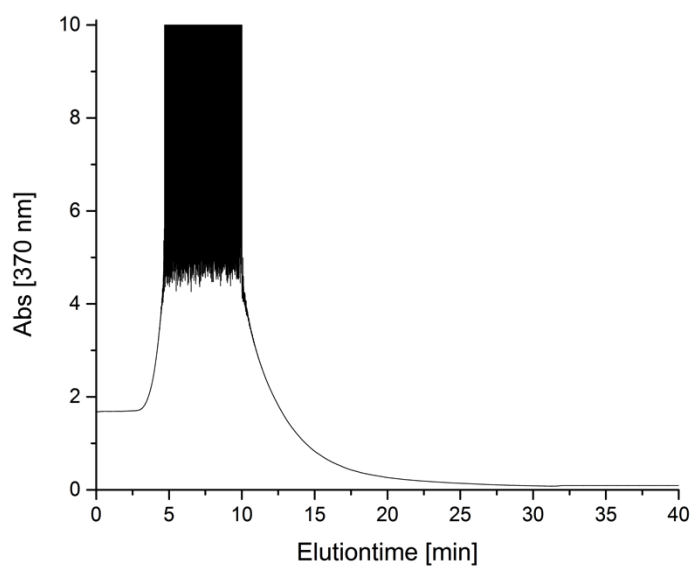

**Figure S4. Elution measurement of a chromate containing 0.1 mol/L NaOH. Flow rate 3.5 ml/min, 100 ml are were eluted after approximately 30 min.**

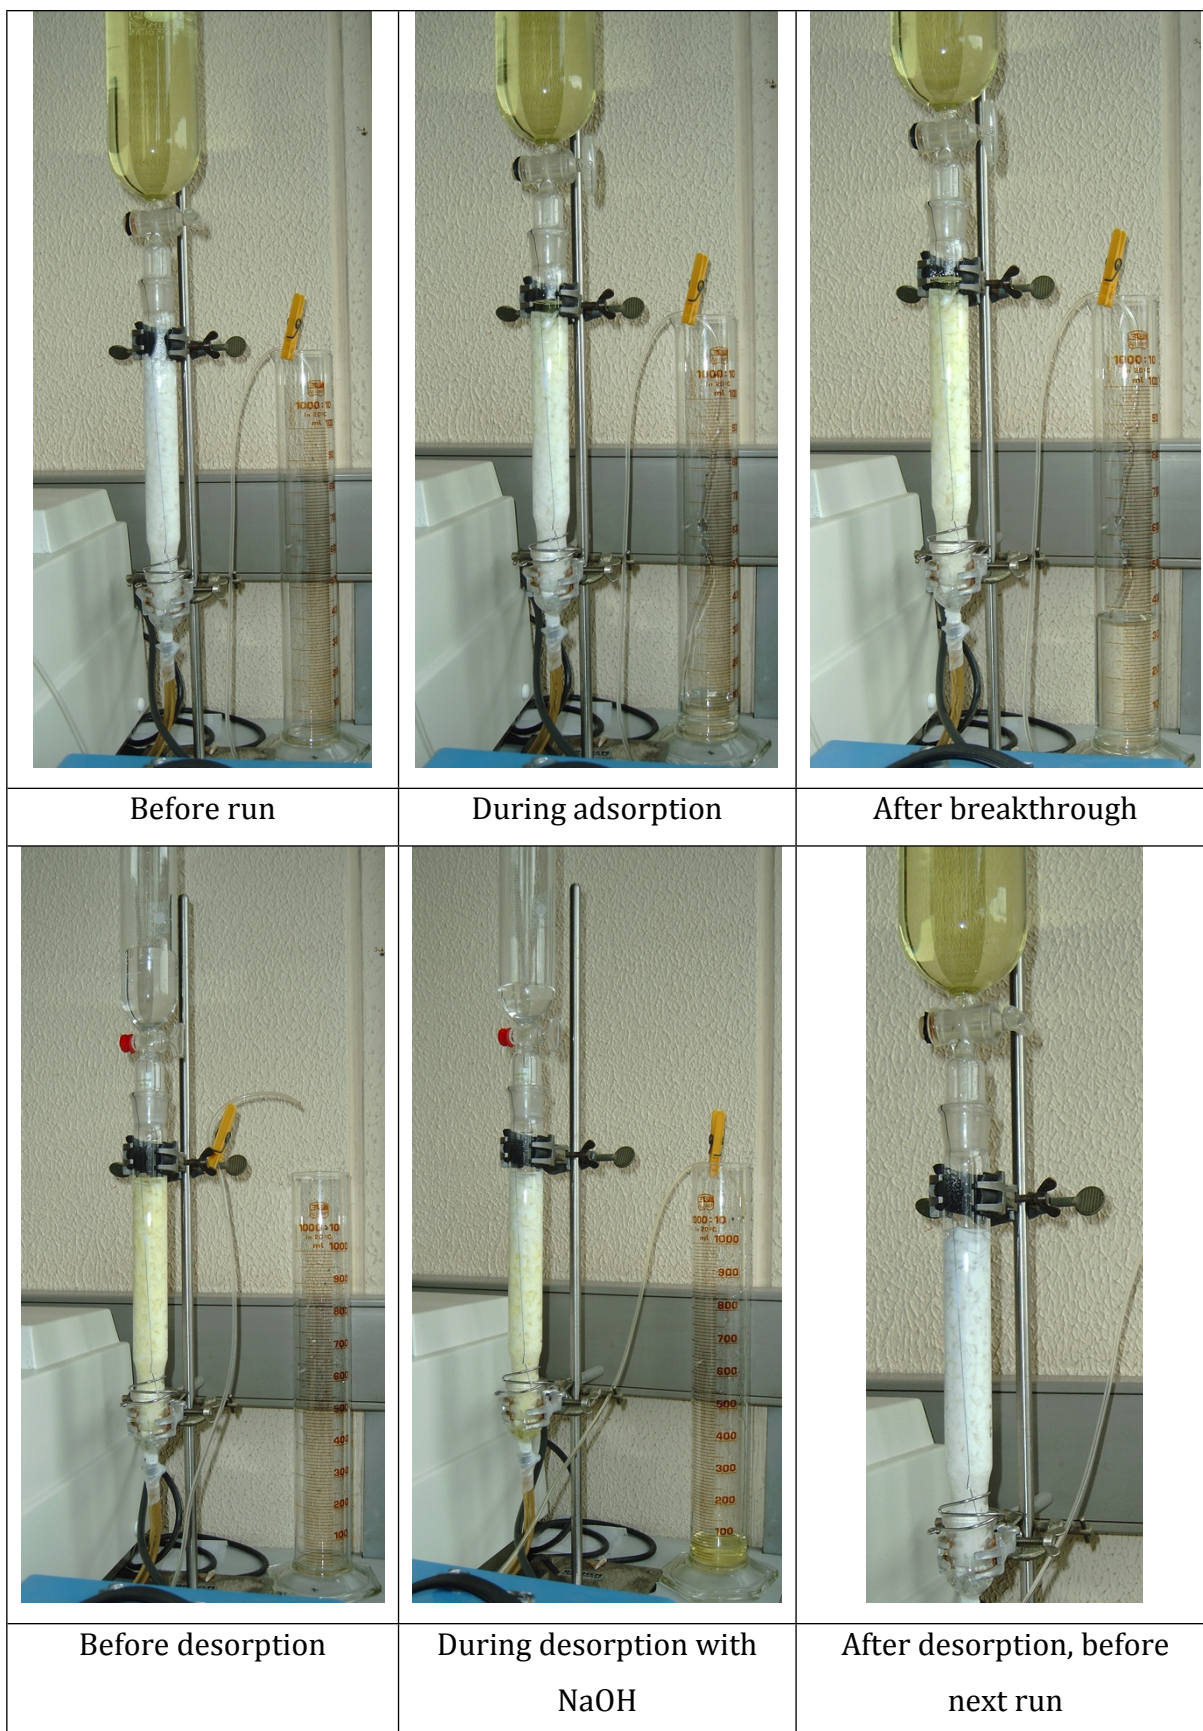

Figure S5. Column at different stages of the measurement and regeneration
